# Supplementary material
Source: PubMed Central journal article supplement (PMC4576085)
Supplement: AAC.01208-15_zac010154476so1.pdf [file AAC.01208-15_zac010154476so1.pdf]

## SUPPLEMENTAL MATERIAL

Antibacterial Action of Nitric Oxide-Releasing Chitosan Oligosaccharides against *Pseudomonas aeruginosa* under Aerobic and Anaerobic Conditions

Katelyn P. Reighard<sup>a</sup> and Mark H. Schoenfisch<sup>a#</sup>

Department of Chemistry, University of North Carolina at Chapel Hill, Chapel Hill, NC, USA <sup>a</sup>

Running Head (54 characters or less): Anaerobic Bactericidal Action of Nitric Oxide

#Address correspondence to Mark H. Schoenfisch, [schoenfisch@unc.edu](mailto:schoenfisch@unc.edu).

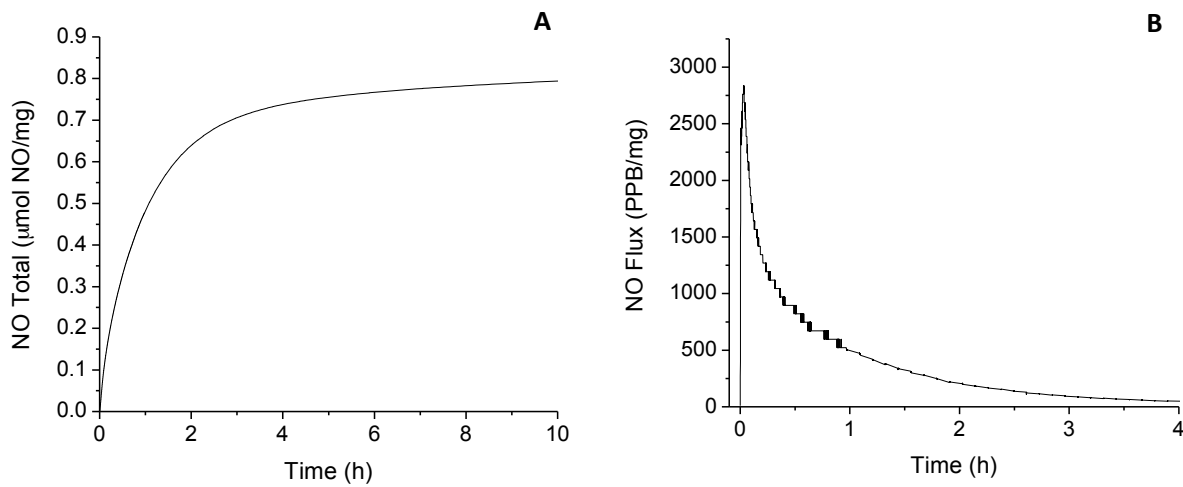

**Figure S1.** Chemiluminescence detection of NO release from COS-NO. The NO release from 1.0 mg of COS-NO was determined in deoxygenated PBS (pH 6.5, 37 °C) for comparison with other NO-releasing systems. (A) The NO total and (B) NO flux of representative measurements are shown. For n= 3 or more pooled experiments, the NO total was  $0.86 \pm 0.05$  µmol NO/mg COS-NO, the NO-release duration was  $10.2 \pm 2.7$  h, and the NO half-life was  $0.63 \pm 0.09$  h.

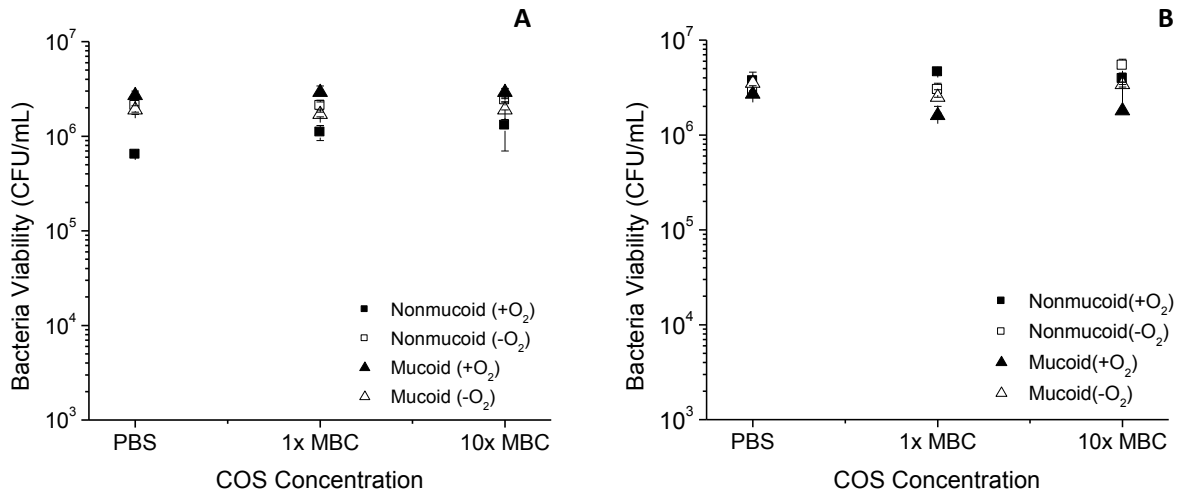

**Figure S2.** Planktonic bacteria viability (in CFU/mL) after a 4 h exposure to COS in PBS. Bacteria were grown (A) aerobically and (B) anaerobically in LB (with nitrate supplementation) and exposed to COS in PBS (pH 6.5). Bacteria were exposed to PBS, 1x, or 10x the reported MBC<sub>4h</sub> against COS-NO. Nonmucooid bacteria are represented by squares (■, □) and the mucooid phenotype is represented by triangles (▲, △). Aerobic exposure conditions are represented by closed symbols (■, ▲) and anaerobic exposure conditions are represented by open symbols (□, △).

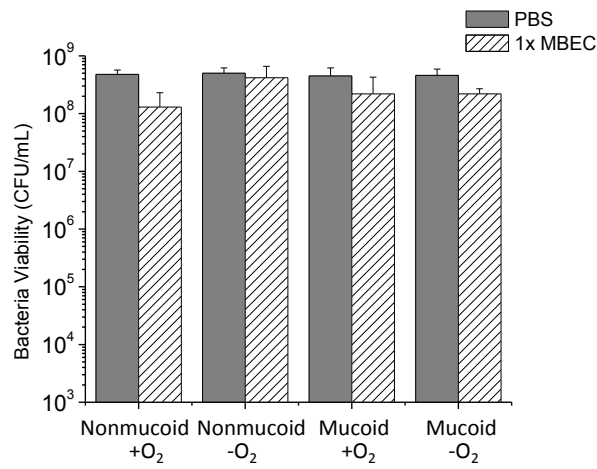

**Figure S3.** Biofilm viability (in CFU/mL) after exposure to COS. Bacteria biofilms were grown for 72 h, then exposed to COS under aerobic or anaerobic conditions for 18 h.
